# Supplementary material for: Longevity is impacted by growth hormone action during early postnatal period
Source: eLife journal article supplement (doi:10.7554/elife.24059), 2017-07-03
Supplement: supp [file elife-24059-supp-v1.zip]

Archive with 2 entries (2 files):
- elife_poa_e24059_Supplementary_file_2.pdf
- elife_poa_e24059_Supplementary_file_1.xlsx
