# Supplementary material for: Longevity is impacted by growth hormone action during early postnatal period
Source: eLife journal article supplement (doi:10.7554/elife.24059), 2017-07-03
Supplement: supp [file elife-24059-supp-v1.zip › elife_poa_e24059_Supplementary_file_1.xlsx]

## Sheet: table
Week	Group	Gender	Treatment	Median lifespan	Wang-Allison p-value		Cox proportional Hazard		Log-Rank p-value	Linear model
					75th percentile	90th percentile	Hazard Ratio	p-value		Adjusted mean lifespan	p-value
Week 1	Normal	All	Saline	702	0.3055	1	1	0.5282	0.5809	698.736	0.9466
			GH	715			0.867			701.496
		Males *	Saline	703	0.2667	0.5471	1	0.15	0.1461	700.364	0.6989
			GH	824.5			0.595			729.643
		Females	Saline	688	0.7315	0.3002	1	0.4419	0.44	698.737	0.6782
			GH	645			1.272			680.48
	Dwarf	All	Saline	1004	0.0462	0.04	1	0.0144	0.0382	988.401	0.0755
			GH	839			2.095			877.775
		Males	Saline	1011	0.1054	0.0856	1	0.0105	0.008	997.062	0.0153
			GH	807			2.661			826.789
		Females	Saline	868	0.3034	0.4737	1	0.3107	0.3031	954.556	0.9919
			GH	970.5			1.702			953.3
Week 2	Normal	All	Saline	738	0.1233	0.3866	1	0.0012	0.0002	769.542	0.0005
			GH	645			2.713			611.057
		Males	Saline	820	0.0331	0.535	1	0.0001	< 0.0001	818.95	0.0002
			GH	659			6.701			522.273
		Females	Saline	661	1	1	1	0.3936	0.3917	707.875	0.4578
			GH	640			1.377			676.067
	Dwarf	All	Saline	1019.5	0.0791	0.0538	1	0.0031	0.0229	1008.5	0.0048
			GH	821			2.279			880.493
		Males	Saline	1011	0.2518	0.25	1	0.0145	0.0114	958	0.0144
			GH	784			2.448			825.667
		Females	Saline	1048	0.35	0.1833	1	0.0575	0.0488	1057.36	0.133
			GH	842.5			2.445			935.5
