# Supplementary material for: Longevity is impacted by growth hormone action during early postnatal period
Source: eLife journal article supplement (doi:10.7554/elife.24059), 2017-07-03
Supplement: supp [file elife-24059-supp-v1.zip › elife_poa_e24059_Supplementary_file_2.pdf]

***Linear model for group=Dwarf, week=week1***

***The GLM Procedure***

| Class Level Information |        |             |
|-------------------------|--------|-------------|
| Class                   | Levels | Values      |
| sex                     | 2      | Female Male |
| treatment               | 2      | GH Saline   |

|                             |    |
|-----------------------------|----|
| Number of Observations Read | 54 |
| Number of Observations Used | 54 |

***Linear model for group=Dwarf, week=week1***

***The GLM Procedure***

***Dependent Variable: day\_alive day alive***

| Source          | DF | Sum of Squares | Mean Square | F Value | Pr > F |
|-----------------|----|----------------|-------------|---------|--------|
| Model           | 2  | 194158.150     | 97079.075   | 1.95    | 0.1534 |
| Error           | 51 | 2545321.775    | 49908.270   |         |        |
| Corrected Total | 53 | 2739479.926    |             |         |        |

| R-Square | Coeff Var | Root MSE | day_alive Mean |
|----------|-----------|----------|----------------|
| 0.070874 | 24.23108  | 223.4016 | 921.9630       |

| Source    | DF | Type I SS   | Mean Square | F Value | Pr > F |
|-----------|----|-------------|-------------|---------|--------|
| sex       | 1  | 29889.9650  | 29889.9650  | 0.60    | 0.4426 |
| treatment | 1  | 164268.1854 | 164268.1854 | 3.29    | 0.0755 |

| Source    | DF | Type III SS | Mean Square | F Value | Pr > F |
|-----------|----|-------------|-------------|---------|--------|
| sex       | 1  | 27703.8190  | 27703.8190  | 0.56    | 0.4597 |
| treatment | 1  | 164268.1854 | 164268.1854 | 3.29    | 0.0755 |

***Linear model for group=Dwarf, week=week1***

***The GLM Procedure***  
***Least Squares Means***

| treatment | day_alive<br>LSMEAN |
|-----------|---------------------|
| GH        | 877.774591          |
| Saline    | 988.401076          |

***Linear model for group=Normal, week=week1***

***The GLM Procedure***

| Class Level Information |        |             |
|-------------------------|--------|-------------|
| Class                   | Levels | Values      |
| group                   | 1      | Normal      |
| sex                     | 2      | Female Male |
| treatment               | 2      | GH Saline   |

|                             |    |
|-----------------------------|----|
| Number of Observations Read | 80 |
| Number of Observations Used | 80 |

***Linear model for group=Normal, week=week1***

***The GLM Procedure***

***Dependent Variable: day\_alive day alive***

| Source          | DF | Sum of Squares | Mean Square | F Value | Pr > F |
|-----------------|----|----------------|-------------|---------|--------|
| Model           | 2  | 10976.466      | 5488.233    | 0.17    | 0.8457 |
| Error           | 77 | 2515421.522    | 32667.812   |         |        |
| Corrected Total | 79 | 2526397.988    |             |         |        |

| R-Square | Coeff Var | Root MSE | day_alive Mean |
|----------|-----------|----------|----------------|
| 0.004345 | 25.86144  | 180.7424 | 698.8875       |

| Source    | DF | Type I SS   | Mean Square | F Value | Pr > F |
|-----------|----|-------------|-------------|---------|--------|
| sex       | 1  | 10829.05568 | 10829.05568 | 0.33    | 0.5665 |
| treatment | 1  | 147.40993   | 147.40993   | 0.00    | 0.9466 |

| Source    | DF | Type III SS | Mean Square | F Value | Pr > F |
|-----------|----|-------------|-------------|---------|--------|
| sex       | 1  | 10932.59318 | 10932.59318 | 0.33    | 0.5646 |
| treatment | 1  | 147.40993   | 147.40993   | 0.00    | 0.9466 |

***Linear model for group=Normal, week=week1***

***The GLM Procedure***  
***Least Squares Means***

| treatment | day_alive<br>LSMEAN |
|-----------|---------------------|
| GH        | 701.496069          |
| Saline    | 698.736053          |

***Linear model for group=Dwarf, sex=Male, week=week1***

***The GLM Procedure***

| Class Level Information |        |           |
|-------------------------|--------|-----------|
| Class                   | Levels | Values    |
| group                   | 1      | Dwarf     |
| sex                     | 1      | Male      |
| treatment               | 2      | GH Saline |

|                             |    |
|-----------------------------|----|
| Number of Observations Read | 35 |
| Number of Observations Used | 35 |

***Linear model for group=Dwarf, sex=Male, week=week1***

***The GLM Procedure***

***Dependent Variable: day\_alive day alive***

| Source          | DF | Sum of Squares | Mean Square | F Value | Pr > F |
|-----------------|----|----------------|-------------|---------|--------|
| Model           | 1  | 251824.076     | 251824.076  | 6.54    | 0.0153 |
| Error           | 33 | 1270370.095    | 38496.063   |         |        |
| Corrected Total | 34 | 1522194.171    |             |         |        |

| R-Square | Coeff Var | Root MSE | day_alive Mean |
|----------|-----------|----------|----------------|
| 0.165435 | 21.68892  | 196.2041 | 904.6286       |

| Source    | DF | Type I SS   | Mean Square | F Value | Pr > F |
|-----------|----|-------------|-------------|---------|--------|
| treatment | 1  | 251824.0760 | 251824.0760 | 6.54    | 0.0153 |

| Source    | DF | Type III SS | Mean Square | F Value | Pr > F |
|-----------|----|-------------|-------------|---------|--------|
| treatment | 1  | 251824.0760 | 251824.0760 | 6.54    | 0.0153 |

***Linear model for group=Dwarf, sex=Male, week=week1***

***The GLM Procedure  
Least Squares Means***

| treatment | day_alive<br>LSMEAN |
|-----------|---------------------|
| GH        | 826.789474          |
| Saline    | 997.062500          |

***Linear model for group=Dwarf, sex=Female, week=week1***

***The GLM Procedure***

| Class Level Information |        |           |
|-------------------------|--------|-----------|
| Class                   | Levels | Values    |
| sex                     | 1      | Female    |
| treatment               | 2      | GH Saline |

|                             |    |
|-----------------------------|----|
| Number of Observations Read | 19 |
| Number of Observations Used | 19 |

***Linear model for group=Dwarf, sex=Female, week=week1***

***The GLM Procedure***

***Dependent Variable: day\_alive day alive***

| Source          | DF | Sum of Squares | Mean Square | F Value | Pr > F |
|-----------------|----|----------------|-------------|---------|--------|
| Model           | 1  | 7.467          | 7.467       | 0.00    | 0.9919 |
| Error           | 17 | 1187388.322    | 69846.372   |         |        |
| Corrected Total | 18 | 1187395.789    |             |         |        |

| R-Square | Coeff Var | Root MSE | day_alive Mean |
|----------|-----------|----------|----------------|
| 0.000006 | 27.70585  | 264.2846 | 953.8947       |

| Source    | DF | Type I SS  | Mean Square | F Value | Pr > F |
|-----------|----|------------|-------------|---------|--------|
| treatment | 1  | 7.46725146 | 7.46725146  | 0.00    | 0.9919 |

| Source    | DF | Type III SS | Mean Square | F Value | Pr > F |
|-----------|----|-------------|-------------|---------|--------|
| treatment | 1  | 7.46725146  | 7.46725146  | 0.00    | 0.9919 |

***Linear model for group=Dwarf, sex=Female, week=week1***

***The GLM Procedure***  
***Least Squares Means***

| treatment | day_alive<br>LSMEAN |
|-----------|---------------------|
| GH        | 953.300000          |
| Saline    | 954.555556          |

***Linear model for group=Normal, sex=Male, week=week1***

***The GLM Procedure***

| Class Level Information |        |           |
|-------------------------|--------|-----------|
| Class                   | Levels | Values    |
| group                   | 1      | Normal    |
| sex                     | 1      | Male      |
| treatment               | 2      | GH Saline |

|                             |    |
|-----------------------------|----|
| Number of Observations Read | 36 |
| Number of Observations Used | 36 |

***Linear model for group=Normal, sex=Male, week=week1***

***The GLM Procedure***

***Dependent Variable: day\_alive day alive***

| Source          | DF | Sum of Squares | Mean Square | F Value | Pr > F |
|-----------------|----|----------------|-------------|---------|--------|
| Model           | 1  | 7334.445       | 7334.445    | 0.15    | 0.6989 |
| Error           | 34 | 1638986.305    | 48205.480   |         |        |
| Corrected Total | 35 | 1646320.750    |             |         |        |

| R-Square | Coeff Var | Root MSE | day_alive Mean |
|----------|-----------|----------|----------------|
| 0.004455 | 30.84755  | 219.5575 | 711.7500       |

| Source    | DF | Type I SS   | Mean Square | F Value | Pr > F |
|-----------|----|-------------|-------------|---------|--------|
| treatment | 1  | 7334.444805 | 7334.444805 | 0.15    | 0.6989 |

| Source    | DF | Type III SS | Mean Square | F Value | Pr > F |
|-----------|----|-------------|-------------|---------|--------|
| treatment | 1  | 7334.444805 | 7334.444805 | 0.15    | 0.6989 |

*Linear model for group=Normal, sex=Male, week=week1*

*The GLM Procedure*  
*Least Squares Means*

| treatment | day_alive<br>LSMEAN |
|-----------|---------------------|
| GH        | 729.642857          |
| Saline    | 700.363636          |

***Linear model for group=Normal, sex=Female, week=week1***

***The GLM Procedure***

| Class Level Information |        |           |
|-------------------------|--------|-----------|
| Class                   | Levels | Values    |
| group                   | 1      | Normal    |
| sex                     | 1      | Female    |
| treatment               | 2      | GH Saline |

|                             |    |
|-----------------------------|----|
| Number of Observations Read | 44 |
| Number of Observations Used | 44 |

***Linear model for group=Normal, sex=Female, week=week1***

***The GLM Procedure***

***Dependent Variable: day\_alive day alive***

| Source          | DF | Sum of Squares | Mean Square | F Value | Pr > F |
|-----------------|----|----------------|-------------|---------|--------|
| Model           | 1  | 3598.2576      | 3598.2576   | 0.17    | 0.6782 |
| Error           | 42 | 865649.9242    | 20610.7125  |         |        |
| Corrected Total | 43 | 869248.1818    |             |         |        |

| R-Square | Coeff Var | Root MSE | day_alive Mean |
|----------|-----------|----------|----------------|
| 0.004140 | 20.85588  | 143.5643 | 688.3636       |

| Source    | DF | Type I SS   | Mean Square | F Value | Pr > F |
|-----------|----|-------------|-------------|---------|--------|
| treatment | 1  | 3598.257608 | 3598.257608 | 0.17    | 0.6782 |

| Source    | DF | Type III SS | Mean Square | F Value | Pr > F |
|-----------|----|-------------|-------------|---------|--------|
| treatment | 1  | 3598.257608 | 3598.257608 | 0.17    | 0.6782 |

***Linear model for group=Normal, sex=Female, week=week1***

***The GLM Procedure  
Least Squares Means***

| treatment | day_alive<br>LSMEAN |
|-----------|---------------------|
| GH        | 680.480000          |
| Saline    | 698.736842          |

***Linear model for group=Dwarf, week=week2***

***The GLM Procedure***

| Class Level Information |        |             |
|-------------------------|--------|-------------|
| Class                   | Levels | Values      |
| group                   | 1      | Dwarf       |
| sex                     | 2      | Female Male |
| treatment               | 2      | GH Saline   |

|                             |    |
|-----------------------------|----|
| Number of Observations Read | 61 |
| Number of Observations Used | 61 |

***Linear model for group=Dwarf, week=week2***

***The GLM Procedure***

***Dependent Variable: day\_alive day alive***

| Source          | DF | Sum of Squares | Mean Square | F Value | Pr > F |
|-----------------|----|----------------|-------------|---------|--------|
| Model           | 2  | 354094.592     | 177047.296  | 6.22    | 0.0036 |
| Error           | 58 | 1651377.638    | 28472.028   |         |        |
| Corrected Total | 60 | 2005472.230    |             |         |        |

| R-Square | Coeff Var | Root MSE | day_alive Mean |
|----------|-----------|----------|----------------|
| 0.176564 | 17.98489  | 168.7366 | 938.2131       |

| Source    | DF | Type I SS   | Mean Square | F Value | Pr > F |
|-----------|----|-------------|-------------|---------|--------|
| sex       | 1  | 109779.2840 | 109779.2840 | 3.86    | 0.0544 |
| treatment | 1  | 244315.3076 | 244315.3076 | 8.58    | 0.0048 |

| Source    | DF | Type III SS | Mean Square | F Value | Pr > F |
|-----------|----|-------------|-------------|---------|--------|
| sex       | 1  | 158230.7877 | 158230.7877 | 5.56    | 0.0218 |
| treatment | 1  | 244315.3076 | 244315.3076 | 8.58    | 0.0048 |

***Linear model for group=Dwarf, week=week2***

***The GLM Procedure***  
***Least Squares Means***

| treatment | day_alive<br>LSMEAN |
|-----------|---------------------|
| GH        | 880.49322           |
| Saline    | 1008.50104          |

***Linear model for group=Normal, week=week2***

***The GLM Procedure***

| Class Level Information |        |             |
|-------------------------|--------|-------------|
| Class                   | Levels | Values      |
| group                   | 1      | Normal      |
| sex                     | 2      | Female Male |
| treatment               | 2      | GH Saline   |

|                             |    |
|-----------------------------|----|
| Number of Observations Read | 62 |
| Number of Observations Used | 62 |

***Linear model for group=Normal, week=week2***

***The GLM Procedure***

***Dependent Variable: day\_alive day alive***

| Source          | DF | Sum of Squares | Mean Square | F Value | Pr > F |
|-----------------|----|----------------|-------------|---------|--------|
| Model           | 2  | 379672.278     | 189836.139  | 6.88    | 0.0021 |
| Error           | 59 | 1628572.319    | 27602.921   |         |        |
| Corrected Total | 61 | 2008244.597    |             |         |        |

| R-Square | Coeff Var | Root MSE | day_alive Mean |
|----------|-----------|----------|----------------|
| 0.189057 | 23.63047  | 166.1413 | 703.0806       |

| Source    | DF | Type I SS   | Mean Square | F Value | Pr > F |
|-----------|----|-------------|-------------|---------|--------|
| sex       | 1  | 6962.0806   | 6962.0806   | 0.25    | 0.6174 |
| treatment | 1  | 372710.1970 | 372710.1970 | 13.50   | 0.0005 |

| Source    | DF | Type III SS | Mean Square | F Value | Pr > F |
|-----------|----|-------------|-------------|---------|--------|
| sex       | 1  | 8.4309      | 8.4309      | 0.00    | 0.9861 |
| treatment | 1  | 372710.1970 | 372710.1970 | 13.50   | 0.0005 |

***Linear model for group=Normal, week=week2***

***The GLM Procedure***  
***Least Squares Means***

| treatment | day_alive<br>LSMEAN |
|-----------|---------------------|
| GH        | 611.057223          |
| Saline    | 769.542006          |

***Linear model for group=Dwarf, sex=Male, week=week2***

***The GLM Procedure***

| Class Level Information |        |           |
|-------------------------|--------|-----------|
| Class                   | Levels | Values    |
| group                   | 1      | Dwarf     |
| sex                     | 1      | Male      |
| treatment               | 2      | GH Saline |

|                             |    |
|-----------------------------|----|
| Number of Observations Read | 36 |
| Number of Observations Used | 36 |

***Linear model for group=Dwarf, sex=Male, week=week2***

***The GLM Procedure***

***Dependent Variable: day\_alive day alive***

| Source          | DF | Sum of Squares | Mean Square | F Value | Pr > F |
|-----------------|----|----------------|-------------|---------|--------|
| Model           | 1  | 153230.9722    | 153230.9722 | 6.65    | 0.0144 |
| Error           | 34 | 783727.3333    | 23050.8039  |         |        |
| Corrected Total | 35 | 936958.3056    |             |         |        |

| R-Square | Coeff Var | Root MSE | day_alive Mean |
|----------|-----------|----------|----------------|
| 0.163541 | 16.81598  | 151.8249 | 902.8611       |

| Source    | DF | Type I SS   | Mean Square | F Value | Pr > F |
|-----------|----|-------------|-------------|---------|--------|
| treatment | 1  | 153230.9722 | 153230.9722 | 6.65    | 0.0144 |

| Source    | DF | Type III SS | Mean Square | F Value | Pr > F |
|-----------|----|-------------|-------------|---------|--------|
| treatment | 1  | 153230.9722 | 153230.9722 | 6.65    | 0.0144 |

***Linear model for group=Dwarf, sex=Male, week=week2***

***The GLM Procedure***  
***Least Squares Means***

| treatment | day_alive<br>LSMEAN |
|-----------|---------------------|
| GH        | 825.666667          |
| Saline    | 958.000000          |

***Linear model for group=Dwarf, sex=Female, week=week2***

***The GLM Procedure***

| Class Level Information |        |           |
|-------------------------|--------|-----------|
| Class                   | Levels | Values    |
| group                   | 1      | Dwarf     |
| sex                     | 1      | Female    |
| treatment               | 2      | GH Saline |

|                             |    |
|-----------------------------|----|
| Number of Observations Read | 25 |
| Number of Observations Used | 25 |

***Linear model for group=Dwarf, sex=Female, week=week2***

***The GLM Procedure***

***Dependent Variable: day\_alive day alive***

| Source          | DF | Sum of Squares | Mean Square | F Value | Pr > F |
|-----------------|----|----------------|-------------|---------|--------|
| Model           | 1  | 91480.5945     | 91480.5945  | 2.43    | 0.1330 |
| Error           | 23 | 867254.0455    | 37706.6976  |         |        |
| Corrected Total | 24 | 958734.6400    |             |         |        |

| R-Square | Coeff Var | Root MSE | day_alive Mean |
|----------|-----------|----------|----------------|
| 0.095418 | 19.63181  | 194.1821 | 989.1200       |

| Source    | DF | Type I SS   | Mean Square | F Value | Pr > F |
|-----------|----|-------------|-------------|---------|--------|
| treatment | 1  | 91480.59455 | 91480.59455 | 2.43    | 0.1330 |

| Source    | DF | Type III SS | Mean Square | F Value | Pr > F |
|-----------|----|-------------|-------------|---------|--------|
| treatment | 1  | 91480.59455 | 91480.59455 | 2.43    | 0.1330 |

***Linear model for group=Dwarf, sex=Female, week=week2***

***The GLM Procedure***  
***Least Squares Means***

| treatment | day_alive<br>LSMEAN |
|-----------|---------------------|
| GH        | 935.50000           |
| Saline    | 1057.36364          |

***Linear model for group=Normal, sex=Male, week=week2***

***The GLM Procedure***

| Class Level Information |        |           |
|-------------------------|--------|-----------|
| Class                   | Levels | Values    |
| group                   | 1      | Normal    |
| sex                     | 1      | Male      |
| treatment               | 2      | GH Saline |

|                             |    |
|-----------------------------|----|
| Number of Observations Read | 31 |
| Number of Observations Used | 31 |

***Linear model for group=Normal, sex=Male, week=week2***

***The GLM Procedure***

***Dependent Variable: day\_alive day alive***

| Source          | DF | Sum of Squares | Mean Square | F Value | Pr > F |
|-----------------|----|----------------|-------------|---------|--------|
| Model           | 1  | 624639.642     | 624639.642  | 18.72   | 0.0002 |
| Error           | 29 | 967613.132     | 33365.970   |         |        |
| Corrected Total | 30 | 1592252.774    |             |         |        |

| R-Square | Coeff Var | Root MSE | day_alive Mean |
|----------|-----------|----------|----------------|
| 0.392299 | 25.59469  | 182.6635 | 713.6774       |

| Source    | DF | Type I SS   | Mean Square | F Value | Pr > F |
|-----------|----|-------------|-------------|---------|--------|
| treatment | 1  | 624639.6424 | 624639.6424 | 18.72   | 0.0002 |

| Source    | DF | Type III SS | Mean Square | F Value | Pr > F |
|-----------|----|-------------|-------------|---------|--------|
| treatment | 1  | 624639.6424 | 624639.6424 | 18.72   | 0.0002 |

***Linear model for group=Normal, sex=Male, week=week2***

***The GLM Procedure  
Least Squares Means***

| treatment | day_alive<br>LSMEAN |
|-----------|---------------------|
| GH        | 522.272727          |
| Saline    | 818.950000          |

***Linear model for group=Normal, sex=Female, week=week2***

***The GLM Procedure***

| Class Level Information |        |           |
|-------------------------|--------|-----------|
| Class                   | Levels | Values    |
| group                   | 1      | Normal    |
| sex                     | 1      | Female    |
| treatment               | 2      | GH Saline |

|                             |    |
|-----------------------------|----|
| Number of Observations Read | 31 |
| Number of Observations Used | 31 |

***Linear model for group=Normal, sex=Female, week=week2***

***The GLM Procedure***

***Dependent Variable: day\_alive day alive***

| Source          | DF | Sum of Squares | Mean Square | F Value | Pr > F |
|-----------------|----|----------------|-------------|---------|--------|
| Model           | 1  | 7833.0586      | 7833.0586   | 0.57    | 0.4578 |
| Error           | 29 | 401196.6833    | 13834.3684  |         |        |
| Corrected Total | 30 | 409029.7419    |             |         |        |

| R-Square | Coeff Var | Root MSE | day_alive Mean |
|----------|-----------|----------|----------------|
| 0.019150 | 16.98517  | 117.6196 | 692.4839       |

| Source    | DF | Type I SS   | Mean Square | F Value | Pr > F |
|-----------|----|-------------|-------------|---------|--------|
| treatment | 1  | 7833.058602 | 7833.058602 | 0.57    | 0.4578 |

| Source    | DF | Type III SS | Mean Square | F Value | Pr > F |
|-----------|----|-------------|-------------|---------|--------|
| treatment | 1  | 7833.058602 | 7833.058602 | 0.57    | 0.4578 |

***Linear model for group=Normal, sex=Female, week=week2***

***The GLM Procedure***  
***Least Squares Means***

| treatment | day_alive<br>LSMEAN |
|-----------|---------------------|
| GH        | 676.066667          |
| Saline    | 707.875000          |
